# Supplementary material for: Effect of In-Person vs Video Training and Access to All Functions vs a Limited Subset of Functions on Portal Use Among Inpatients: A Randomized Clinical Trial
Source: PubMed Central journal article supplement (PMC9471980; doi:10.1001/jamanetworkopen.2022.31321), 2022-09-13
Supplement: jamanetwopen-e2231321-s002.pdf [file jamanetwopen-e2231321-s002.pdf]

## Supplementary Online Content

McAlearney AS, Walker DM, Sieck CJ, et al. Effect of in-person vs video training and access to all functions vs a limited subset of functions on portal use among inpatients: a randomized clinical trial. *JAMA Netw Open*. 2022;5(9):e2231321. doi:10.1001/jamanetworkopen.2022.31321

**eMethods.** Information About Trial Procedures

**eTable 1.** MyChart Bedside Inpatient Portal Functions

**eTable 2.** Demographic and Clinical Characteristics for Patient Enrollment Admission by Survey Type and Study Group Assignment

**eTable 3.** Inpatient Portal Use Outcomes, Interaction, and Noninteraction Models

**eTable 4.** Patient Satisfaction Outcomes by Study Group Assignment

**eTable 5.** Patient Involvement Outcomes by Study Group Assignment

**eTable 6.** Inpatient Portal Use Outcomes in Full-Tech Subsample

This supplementary material has been provided by the authors to give readers additional information about their work.

## eMethods. Information About Trial Procedures

### Provisioning of Tablets with Inpatient Portal Application

Provisioning of tablets to patients was performed under a clinical protocol developed by the OSUWMC and was considered usual care during the course of the study. The provisioning workflow for each patient required that the inpatient portal application on the tablet be registered and linked to the patient's medical record.

### Trial Design and Hypotheses

The trial was designed to evaluate two hypotheses related to the primary outcomes of portal usage (H1) and satisfaction and involvement with the care experience (H2).

*H1: Patients assigned to the High intervention levels for Tech and Touch will demonstrate higher use of the MyChart Bedside inpatient portal.*

*H2: Patients assigned to the High intervention levels for Tech and Touch will demonstrate higher levels of satisfaction with (H2a) and involvement in (H2b) their care experience.*

### Touch Intervention Protocol

The study training protocol for the Touch intervention groups was developed with input from an Implementation Working Group composed of patients, providers, research team members, and education specialists. As part of this training protocol, a video was developed and produced by the OSUWMC Department of Patient Education with input from the research team to outline the functions of the full-tech and lite-tech versions inpatient portal application. The full-tech training video lasted 11:17 minutes and the lite-tech training video lasted 4:29 minutes. Training in both Touch groups was designed to be delivered in person, one-on-one, by a study-provided research assistant trained to be a Technology Navigator (TN). In both Touch groups, study participants had access to in-application contextual help as well as to health system-provided tip sheets about use of MyChart Bedside. There were no time limits for training of Low- and High-Touch, and in both groups, the TN ended the training when the patient had no further questions. In the High-Touch group, the TN training session lasted an average of 13 minutes (range 2-24 minutes), and depended on the patient's level of confidence to navigate the application with out in-person support. In the Low-Touch group, the TN training session lasted an average of 6.7 minutes (range 2-24 minutes); when patients asked questions in the Low-Touch session, they were respectfully directed to the video and in-application conceptual help and tip sheets.

### Trial Survey Deployment

Once a patient provided informed consent, the study Admission survey was activated and could be completed on the OSUWMC-provided tablet; it was also available on paper if the patient preferred that modality. The Admission survey was accessible for the patient to complete throughout their inpatient stay. Patients were reminded up to three times, in-person, by TNs to complete the Admission survey. Following discharge, all patients were contacted and asked to complete two follow-up surveys: a 15-day Post-discharge survey and a 6-month Post-discharge survey. Patients could indicate their preference to be contacted by email or phone and could complete the surveys either electronically, through a web link to their preferred email, or over the phone with a TN. Patients were contacted no less than three times to request completion of the follow-up survey; however, this number was increased if the patient changed their communication preference (e.g., from email to phone), at which point the contact protocol was restarted.

**eTable 1. MyChart Bedside Inpatient Portal Functions**

| <b>MyChart Bedside Function</b> | <b>Description</b>                                                                          |
|---------------------------------|---------------------------------------------------------------------------------------------|
| Dining On Demand*               | Order a meal from a predefined menu                                                         |
| Bedside Tutorial*               | Access tutorials on the use of MyChart Bedside                                              |
| To Learn*                       | Access training materials through a link to an external health information content provider |
| My Health                       | Review vitals and laboratory test results                                                   |
| Happening Soon                  | Review scheduled upcoming interactions with the care team                                   |
| Notes                           | Record and review personal notes (audio and written)                                        |
| Messages                        | Send and review secure messages                                                             |
| I Would Like                    | Request one of a number of ancillary services                                               |
| OSU MyChart                     | Create an outpatient MyChart account or change the password on an existing MyChart account  |
| Taking Care of Me               | Review active members of the care team                                                      |

\* Function available in Lite-Tech version of MyChart Bedside

**eTable 2. Demographic and Clinical Characteristics for Patient Enrollment Admission by Survey Type and Study Group Assignment**

|                                              | Total                      |                                      |                                       | Full-Tech                  |                                      |                                       |                          |                                      |                                       | Lite-Tech                |                                     |                                      |                          |                                     |                                      |
|----------------------------------------------|----------------------------|--------------------------------------|---------------------------------------|----------------------------|--------------------------------------|---------------------------------------|--------------------------|--------------------------------------|---------------------------------------|--------------------------|-------------------------------------|--------------------------------------|--------------------------|-------------------------------------|--------------------------------------|
|                                              |                            |                                      |                                       | Low-Touch (N=1,523)        |                                      |                                       | High-Touch (N=624)       |                                      |                                       | Low-Touch (N=468)        |                                     |                                      | High-Touch (N=277)       |                                     |                                      |
|                                              | Admission survey (n=2,836) | 15-day Post-discharge survey (n=459) | 6-month Post-discharge survey (n=673) | Admission survey (n=1,481) | 15-day Post-discharge survey (n=187) | 6-month Post-discharge survey (n=346) | Admission survey (n=623) | 15-day Post-discharge survey (n=154) | 6-month Post-discharge survey (n=150) | Admission survey (n=456) | 15-day Post-discharge survey (n=60) | 6-month Post-discharge survey (n=95) | Admission survey (n=276) | 15-day Post-discharge survey (n=58) | 6-month Post-discharge survey (n=82) |
| Female – n (%)                               | 1,606 (56.6)               | 264 (57.5)                           | 410 (60.9)                            | 846 (57.1)                 | 105 (56.2)                           | 217 (62.7)                            | 357 (57.3)               | 90 (58.4)                            | 92 (61.3)                             | 252 (55.3)               | 35 (58.3)                           | 57 (60.0)                            | 151 (54.7)               | 34 (58.6)                           | 44 (53.7)                            |
| Race – n (%)                                 |                            |                                      |                                       |                            |                                      |                                       |                          |                                      |                                       |                          |                                     |                                      |                          |                                     |                                      |
| White                                        | 2,184 (77.0)               | 378 (82.4)                           | 556 (82.6)                            | 1,117 (75.4)               | 145 (77.5)                           | 277 (80.1)                            | 504 (80.9)               | 126 (81.8)                           | 132 (88.0)                            | 344 (75.4)               | 55 (91.7)                           | 79 (83.2)                            | 219 (79.4)               | 52 (89.7)                           | 68 (82.9)                            |
| Black                                        | 534 (18.8)                 | 62 (13.5)                            | 101 (15.0)                            | 303 (20.5)                 | 32 (17.1)                            | 60 (17.3)                             | 96 (15.4)                | 21 (13.6)                            | 16 (10.7)                             | 89 (19.5)                | 4 (6.7)                             | 12 (12.6)                            | 46 (16.7)                | 5 (8.6)                             | 13 (15.9)                            |
| Other                                        | 118 (4.2)                  | 19 (4.1)                             | 16 (2.4)                              | 61 (4.1)                   | 10 (5.4)                             | 9 (2.6)                               | 23 (3.7)                 | 7 (4.6)                              | 2 (1.3)                               | 23 (5.0)                 | 1 (1.7)                             | 4 (4.2)                              | 11 (4.0)                 | 1 (1.7)                             | 1 (1.2)                              |
| Age in years – median (95% CI)               | 47 (46.0, 48.0)            | 51 (49.0, 53.0)                      | 52 (50.0, 54.0)                       | 46 (45.0, 48.0)            | 52 (49.0, 54.0)                      | 52 (49.0, 55.0)                       | 47 (45.0, 49.0)          | 48 (42.3, 51.0)                      | 48 (45.0, 51.0)                       | 48 (45.0, 50.0)          | 53 (45.0, 59.1)                     | 57 (53.3, 60.0)                      | 49 (46.0, 51.0)          | 53 (46.1, 58.0)                     | 54 (49.0, 59.4)                      |
| Charlson Comorbidity Index – median (95% CI) | 1 (1.0, 2.0)               | 1 (1.0, 2.0)                         | 1 (1.0, 2.0)                          | 1 (1.0, 2.0)               | 2 (1.0, 2.0)                         | 1 (1.0, 2.0)                          | 1 (1.0, 1.0)             | 1 (1.0, 1.7)                         | 1 (1.0, 2.0)                          | 1 (1.0, 2.0)             | 1 (0.0, 2.0)                        | 1 (1.0, 2.0)                         | 2 (1.0, 2.0)             | 2 (1.0, 2.0)                        | 2 (1.0, 2.0)                         |
| Length of stay in days – median (95% CI)     | 6 (6.0, 7.0)               | 7 (6.0, 7.0)                         | 6 (5.0, 6.0)                          | 6 (6.0, 6.0)               | 6 (5.0, 7.0)                         | 5 (5.0, 6.0)                          | 7 (7.0, 8.0)             | 7 (6.0, 8.0)                         | 7 (6.0, 8.0)                          | 6 (5.0, 6.0)             | 6 (5.0, 7.0)                        | 6 (5.0, 7.0)                         | 7 (6.0, 8.0)             | 7 (6.0, 7.0)                        | 6 (5.0, 7.0)                         |

Abbreviation: CI, confidence interval.

**eTable 3. Inpatient Portal Use Outcomes, Interaction, and Noninteraction Models**

|                                                      | <b>N</b> | <b>Median (95% CI)</b>  | <b>Full-Tech<br/>IRR (95% CI)</b> | <b>High-Touch<br/>IRR (95% CI)</b> | <b>Tech X Touch<br/>IRR (95% CI)</b> |
|------------------------------------------------------|----------|-------------------------|-----------------------------------|------------------------------------|--------------------------------------|
| Sessions in enrollment admission                     | 2,892    | 18.0 (17.0, 19.0)       | 1.44 (1.25 to 1.66)               | 1.29 (1.14 to 1.46)                | 1.06 (0.98 to 1.15)                  |
|                                                      |          |                         | 1.47 (1.25 to 1.72)               | 1.34 (1.25 to 1.44)                |                                      |
|                                                      | <b>N</b> | <b>No. positive (%)</b> | <b>Full-Tech<br/>OR (95% CI)</b>  | <b>High-Touch<br/>OR (95% CI)</b>  | <b>Tech X Touch<br/>OR (95% CI)</b>  |
| Comprehensiveness*<br>(comprehensive functions user) | 2,892    | 1,346 (46.5)            | 0.74 (0.69 to 0.81)               | 16.82 (13.05 to 21.69)             | 1.34 (0.94 to 1.90)                  |
|                                                      |          |                         | 0.79 (0.72 to 0.87)               | 20.75 (16.49 to 26.10)             |                                      |

Abbreviations: IRR, incidence rate ratio; OR, odds ratio; CI, confidence interval.

The top row for each outcome reports main effects and interaction effects; the bottom row for each outcome reports main effects only.

\*A comprehensive portal user was one who used all three Lite-Tech functions or used eight or more Full-Tech functions.

†A comprehensive portal user was one who used all three Lite-Tech functions.

**eTable 4. Patient Satisfaction Outcomes by Study Group Assignment**

| Outcome                                                                                                                                                          | N   | Study groups          |                        |                       |                        | Intervention effects |                |                     |               |
|------------------------------------------------------------------------------------------------------------------------------------------------------------------|-----|-----------------------|------------------------|-----------------------|------------------------|----------------------|----------------|---------------------|---------------|
|                                                                                                                                                                  |     | Lite-Tech + Low-Touch | Lite-Tech + High-Touch | Full-Tech + Low-Touch | Full-Tech + High-Touch | Any High-Touch       | Any Low-Touch  | Any Full-Tech       | Any Lite-Tech |
| <b>15 day discharge: In your most recent hospital experience, how satisfied were you with how well your healthcare professionals responded to your concerns?</b> |     |                       |                        |                       |                        |                      |                |                     |               |
| Most positive response — n / total (%)                                                                                                                           | 396 | 36/53 (67.9)          | 36/53 (67.9)           | 107/157 (68.2)        | 94/133 (70.7)          | 130/186 (69.9)       | 143/210 (68.1) | 201/290 (69.3)      | 72/106 (67.9) |
| Odds ratio (95% CI)                                                                                                                                              |     | —                     | —                      | —                     | —                      | 1.11 (0.58 to 2.14)  |                | 1.11 (0.65 to 1.88) |               |
| <b>6 month discharge: In the past 6 months, how satisfied were you with how well your healthcare professionals responded to your concerns?</b>                   |     |                       |                        |                       |                        |                      |                |                     |               |
| Most positive response — n / total (%)                                                                                                                           | 558 | 36/78 (46.2)          | 47/73 (64.4)           | 172/273 (63.0)        | 84/134 (62.7)          | 131/207 (63.3)       | 208/351 (59.3) | 256/407 (62.9)      | 83/151 (55.0) |
| Odds ratio (95% CI)                                                                                                                                              |     | —                     | —                      | —                     | —                      | 2.01 (1.16 to 3.50)  |                | 2.06 (1.42 to 2.99) |               |
| Interaction effect (95% CI)                                                                                                                                      |     |                       |                        |                       |                        | 0.50 (0.29 to 0.85)  |                |                     |               |
| <b>15 day discharge: In your most recent hospital experience, how satisfied were you with the interactions you had with your healthcare professionals?</b>       |     |                       |                        |                       |                        |                      |                |                     |               |
| Most positive response — n / total (%)                                                                                                                           | 397 | 35/52 (67.3)          | 37/53 (69.8)           | 104/159 (65.4)        | 105/133 (78.9)         | 142/186 (76.3)       | 139/211 (65.9) | 209/292 (71.6)      | 72/105 (68.6) |
| Odds ratio (95% CI)                                                                                                                                              |     |                       |                        |                       |                        | 1.78 (1.09 to 2.90)  |                | 1.21 (0.68 to 2.18) |               |
| <b>6 month discharge: In the past 6 months, how satisfied were you with the interactions you had with your healthcare professionals?</b>                         |     |                       |                        |                       |                        |                      |                |                     |               |
| Most positive response — n / total (%)                                                                                                                           | 569 | 46/79 (58.2)          | 50/74 (67.6)           | 185/280 (66.1)        | 95/136 (69.9)          | 145/210 (69.0)       | 231/359 (64.3) | 280/416 (67.3)      | 96/153 (62.7) |
| Odds ratio (95% CI)                                                                                                                                              |     |                       |                        |                       |                        | 1.28 (1.08 to 1.53)  |                | 1.23 (0.69 to 2.18) |               |

All models include the comparable survey item from the admission survey as a control variable.

**eTable 5. Patient Involvement Outcomes by Study Group Assignment**

| Outcome                                                                                                                                       | N   | Study groups          |                        |                       |                        | Intervention effects |                |                     |                |
|-----------------------------------------------------------------------------------------------------------------------------------------------|-----|-----------------------|------------------------|-----------------------|------------------------|----------------------|----------------|---------------------|----------------|
|                                                                                                                                               |     | Lite-Tech + Low-Touch | Lite-Tech + High-Touch | Full-Tech + Low-Touch | Full-Tech + High-Touch | Any High-Touch       | Any Low-Touch  | Any Full-Tech       | Any Lite-Tech  |
| <b>All of my questions about managing my health, including my medications, were addressed before I left the hospital.</b>                     |     |                       |                        |                       |                        |                      |                |                     |                |
| Most positive response — n / total (%)                                                                                                        | 396 | 37/58 (63.8)          | 37/58 (63.8)           | 118/184 (64.1)        | 112/153 (73.2)         | 149/211 (70.6)       | 155/242 (64.0) | 230/337 (68.2)      | 74/116 (63.8)  |
| Odds ratio (95% CI)                                                                                                                           |     | —                     | —                      | —                     | —                      | 1.36 (1.10 to 1.67)  |                | 1.24 (0.82 to 1.88) |                |
| <b>If you had a question about your care while you were in the hospital, what steps did you take to find an answer? (mark all that apply)</b> |     |                       |                        |                       |                        |                      |                |                     |                |
| I asked my doctor                                                                                                                             |     |                       |                        |                       |                        |                      |                |                     |                |
| Most positive response — n / total (%)                                                                                                        | 457 | 46/60 (76.7)          | 46/58 (79.3)           | 142/186 (76.3)        | 107/153 (69.9)         | 153/211 (72.5)       | 188/246 (76.4) | 249/339 (73.5)      | 92/118 (78.0)  |
| Odds ratio (95% CI)                                                                                                                           |     | —                     | —                      | —                     | —                      | 0.81 (0.38 to 1.72)  |                | 0.77 (0.59 to 1.02) |                |
| I asked a nurse                                                                                                                               |     |                       |                        |                       |                        |                      |                |                     |                |
| Most positive response — n / total (%)                                                                                                        | 457 | 54/60 (90.0)          | 51/58 (87.9)           | 169/186 (90.9)        | 142/153 (92.8)         | 193/211 (91.5)       | 223/246 (90.7) | 311/339 (91.7)      | 105/118 (89.0) |
| Odds ratio (95% CI)                                                                                                                           |     | —                     | —                      | —                     | —                      | 1.12 (0.78 to 1.59)  |                | 1.38 (0.91 to 2.11) |                |
| I asked another hospital staff member                                                                                                         |     |                       |                        |                       |                        |                      |                |                     |                |
| Most positive response — n / total (%)                                                                                                        | 457 | 17/60 (28.3)          | 19/58 (32.8)           | 52/186 (28.0)         | 36/153 (23.5)          | 55/211 (26.1)        | 69/246 (28.0)  | 88/339 (26.0)       | 36/118 (30.5)  |
| Odds ratio (95% CI)                                                                                                                           |     | —                     | —                      | —                     | —                      | 1.23 (0.92 to 1.65)  |                | 0.98 (0.67 to 1.43) |                |
| Interaction effect (95% CI)                                                                                                                   |     |                       |                        |                       |                        | 0.64 (0.45 to 0.92)  |                |                     |                |
| I searched online                                                                                                                             |     |                       |                        |                       |                        |                      |                |                     |                |
| Most positive response — n / total (%)                                                                                                        | 457 | 14/60 (23.3)          | 16/58 (27.6)           | 59/186 (31.7)         | 50/153 (32.7)          | 66/211 (31.3)        | 73/246 (29.7)  | 109/339 (32.2)      | 30/118 (25.4)  |
| Odds ratio (95% CI)                                                                                                                           |     | —                     | —                      | —                     | —                      | 1.09 (0.79 to 1.51)  |                | 1.40 (0.99 to 1.97) |                |
| Other                                                                                                                                         |     |                       |                        |                       |                        |                      |                |                     |                |
| Most positive response — n / total (%)                                                                                                        | 457 | 4/60 (6.7)            | 2/58 (3.4)             | 11/186 (5.9)          | 12/153 (7.8)           | 14/211 (6.6)         | 15/246 (6.1)   | 23/339 (6.8)        | 6/118 (5.1)    |
| Odds ratio (95% CI)                                                                                                                           |     | —                     | —                      | —                     | —                      | 1.10 (0.62 to 1.97)  |                | 1.36 (0.46 to 4.02) |                |
| I did not have questions                                                                                                                      |     |                       |                        |                       |                        |                      |                |                     |                |
| Most positive response — n / total (%)                                                                                                        | 457 | 1/60 (1.7)            | 1/58 (1.7)             | 6/186 (3.2)           | 5/153 (3.3)            | 6/211 (2.8)          | 7/246 (2.8)    | 11/339 (3.2)        | 2/118 (1.7)    |
| Odds ratio (95% CI)                                                                                                                           |     | —                     | —                      | —                     | —                      | 1.02 (0.35 to 2.92)  |                | 1.95 (0.64 to 5.93) |                |
| <b>What kinds of activities did you use the tablet for? (mark all that apply)</b>                                                             |     |                       |                        |                       |                        |                      |                |                     |                |
| Email                                                                                                                                         |     |                       |                        |                       |                        |                      |                |                     |                |
| Most positive response — n / total (%)                                                                                                        | 454 | 7/59 (11.9)           | 7/58 (12.1)            | 29/183 (15.8)         | 18/154 (11.7)          | 25/212 (11.8)        | 36/242 (14.9)  | 47/337 (13.9)       | 14/117 (12.0)  |
| Odds ratio (95% CI)                                                                                                                           |     | —                     | —                      | —                     | —                      | 0.77 (0.43, 1.37)    |                | 1.18 (0.69, 2.01)   |                |
| Research health issues                                                                                                                        |     |                       |                        |                       |                        |                      |                |                     |                |
| Most positive response — n / total (%)                                                                                                        | 454 | 26/59 (44.1)          | 23/58 (39.7)           | 82/183 (44.8)         | 84/154 (54.5)          | 107/212 (50.5)       | 108/242 (44.6) | 166/337 (49.3)      | 49/117 (41.9)  |
| Odds ratio (95% CI)                                                                                                                           |     | —                     | —                      | —                     | —                      | 0.83 (0.52, 1.35)    |                | 1.03 (0.77, 1.38)   |                |
| Interaction effect (95% CI)                                                                                                                   |     |                       |                        |                       |                        | 1.77 (1.05, 2.98)    |                |                     |                |
| Social media                                                                                                                                  |     |                       |                        |                       |                        |                      |                |                     |                |
| Most positive response — n / total (%)                                                                                                        | 454 | 11/59 (18.6)          | 7/58 (12.1)            | 36/183 (19.7)         | 27/154 (17.5)          | 34/212 (16.0)        | 47/242 (19.4)  | 63/337 (18.7)       | 18/117 (15.4)  |
| Odds ratio (95% CI)                                                                                                                           |     | —                     | —                      | —                     | —                      | 0.80 (0.43 to 1.49)  |                | 1.25 (0.78 to 2.03) |                |
| Watch movies/TV                                                                                                                               |     |                       |                        |                       |                        |                      |                |                     |                |
| Most positive response — n / total (%)                                                                                                        | 454 | 4/59 (6.8)            | 5/58 (8.6)             | 17/183 (9.3)          | 10/154 (6.5)           | 15/212 (7.1)         | 21/242 (8.7)   | 27/337 (8.0)        | 9/117 (7.7)    |
| Odds ratio (95% CI)                                                                                                                           |     | —                     | —                      | —                     | —                      | 0.80 (0.55, 1.16)    |                | 1.04 (0.50, 2.16)   |                |
| Communicate with my family                                                                                                                    |     |                       |                        |                       |                        |                      |                |                     |                |
| Most positive response — n / total (%)                                                                                                        | 454 | 5/59 (8.5)            | 3/58 (5.2)             | 19/183 (10.4)         | 10/154 (6.5)           | 13/212 (6.1)         | 24/242 (9.9)   | 29/337 (8.6)        | 8/117 (6.8)    |
| Odds ratio (95% CI)                                                                                                                           |     | —                     | —                      | —                     | —                      | 0.60 (0.19, 1.83)    |                | 1.26 (0.63, 2.50)   |                |
| Play games                                                                                                                                    |     |                       |                        |                       |                        |                      |                |                     |                |
| Most positive response — n / total (%)                                                                                                        | 454 | 20/59 (33.9)          | 21/58 (36.2)           | 49/183 (26.8)         | 47/154 (30.5)          | 68/212 (32.1)        | 69/242 (28.5)  | 96/337 (28.5)       | 41/117 (35.0)  |
| Odds ratio (95% CI)                                                                                                                           |     | —                     | —                      | —                     | —                      | 1.17 (0.75 to 1.85)  |                | 0.74 (0.69 to 0.80) |                |
| MyChart Bedside                                                                                                                               |     |                       |                        |                       |                        |                      |                |                     |                |
| Most positive response — n / total (%)                                                                                                        | 454 | 50/59 (84.7)          | 49/58 (84.5)           | 167/183 (91.3)        | 143/154 (92.9)         | 192/212 (90.6)       | 217/242 (89.7) | 310/337 (92.0)      | 99/117 (84.6)  |
| Odds ratio (95% CI)                                                                                                                           |     | —                     | —                      | —                     | —                      | 1.14 (0.67 to 1.93)  |                | 2.10 (1.10 to 4.01) |                |
| None of the above                                                                                                                             |     |                       |                        |                       |                        |                      |                |                     |                |
| Most positive response — n / total (%)                                                                                                        | 454 | 5/59 (8.5)            | 4/58 (6.9)             | 7/183 (3.8)           | 6/154 (3.9)            | 10/212 (4.7)         | 12/242 (5.0)   | 13/337 (3.9)        | 9/117 (7.7)    |

|                     |  |   |   |   |   |  |                        |                        |
|---------------------|--|---|---|---|---|--|------------------------|------------------------|
| Odds ratio (95% CI) |  | — | — | — | — |  | 0.93<br>(0.49 to 1.75) | 0.48<br>(0.14 to 1.63) |
|---------------------|--|---|---|---|---|--|------------------------|------------------------|

Patient involvement items were only asked in the 15-day Post-discharge survey.

Responses from multiple response questions were coded as 1 if selected by the respondent, and 0 if the respondent selected any other response options from the question but not the given response.



**eTable 6. Inpatient Portal Use Outcomes in Full-Tech Subsample**

| Outcome                                                        | N    | Low-Touch              | High-Touch     |
|----------------------------------------------------------------|------|------------------------|----------------|
| <b>Inpatient portal frequency of use</b>                       |      |                        |                |
| Sessions in enrollment admission — patient no. (mean sessions) | 2147 | 1523 (26.5)            | 624 (36.1)     |
| Incidence rate ratio (95% CI)                                  |      | 1.36 (1.29 to 1.44)    |                |
| <b>Inpatient portal comprehensiveness of use</b>               |      |                        |                |
| Comprehensive portal user* — n / total (%)                     | 2147 | 396/1523 (26.0)        | 554/624 (88.8) |
| Odds ratio (95% CI)                                            |      | 22.52 (16.88 to 30.06) |                |
| <b>Inpatient portal functions</b>                              |      |                        |                |
| Dining on Demand, mean proportion (sd)                         | 2146 | 0.22 (0.19)            | 0.18 (0.14)    |
| Odds ratio (95% CI)                                            |      | 0.75 (0.68 to 0.82)    |                |
| Tutorial, mean proportion (sd)                                 | 2146 | 0.19 (0.22)            | 0.12 (0.10)    |
| Odds ratio (95% CI)                                            |      | 0.56 (0.53 to 0.59)    |                |
| To Learn, mean proportion (sd)                                 | 2146 | 0.01 (0.04)            | 0.03 (0.03)    |
| Odds ratio (95% CI)                                            |      | 1.84 (1.73 to 1.96)    |                |
| My Health, mean proportion (sd)                                | 2146 | 0.09 (0.17)            | 0.13 (0.15)    |
| Odds ratio (95% CI)                                            |      | 1.45 (1.27 to 1.66)    |                |
| Happening Soon, mean proportion (sd)                           | 2146 | 0.37 (0.25)            | 0.42 (0.19)    |
| Odds ratio (95% CI)                                            |      | 1.24 (1.20 to 1.28)    |                |
| Notes, mean proportion (sd)                                    | 2146 | 0.00 (0.00)            | 0.00 (0.00)    |
| Odds ratio (95% CI)                                            |      | 1.32 (0.56 to 3.11)    |                |
| Messages, mean proportion (sd)                                 | 2146 | 0.03 (0.05)            | 0.04 (0.03)    |
| Odds ratio (95% CI)                                            |      | 1.13 (0.99 to 1.30)    |                |
| I Would Like, mean proportion (sd)                             | 2146 | 0.00 (0.01)            | 0.01 (0.01)    |
| Odds ratio (95% CI)                                            |      | 2.55 (2.26 to 2.88)    |                |
| OSU MyChart, mean proportion (sd)                              | 2146 | 0.03 (0.04)            | 0.03 (0.03)    |
| Odds ratio (95% CI)                                            |      | 1.25 (0.97 to 1.60)    |                |
| Taking Care of Me, mean proportion (sd)                        | 2146 | 0.04 (0.05)            | 0.05 (0.03)    |
| Odds ratio (95% CI)                                            |      | 1.16 (1.04 to 1.29)    |                |

\* A comprehensive portal user was one who used eight or more Full-Tech functions.

† Adjusted for frequency of use prior to study enrollment.
