# Supplementary material for: Effect of In-Person vs Video Training and Access to All Functions vs a Limited Subset of Functions on Portal Use Among Inpatients: A Randomized Clinical Trial
Source: PubMed Central journal article supplement (PMC9471980; doi:10.1001/jamanetworkopen.2022.31321), 2022-09-13
Supplement: jamanetwopen-e2231321-s003.pdf [file jamanetwopen-e2231321-s003.pdf]

## Data Sharing Statement

McAlearney. Effect of In-Person vs Video Training and Access to All Functions vs a Limited Subset of Functions on Portal Use Among Inpatients. *JAMA Netw Open*. Published September 13, 2022. doi:10.1001/jamanetworkopen.2022.31321

### Data

**Data available:** Yes

**Data types:** Deidentified participant data

**How to access data:** Data may be requested from the PI via a request to [ht2study@osumc.edu](mailto:ht2study@osumc.edu)

**When available:** beginning date: 07-01-2023

### Supporting Documents

**Document types:** Statistical/analytic code

**How to access documents:** Supporting documents may be requested from the PI via a request to [ht2study@osumc.edu](mailto:ht2study@osumc.edu)

**When available:** beginning date: 07-01-2023

### Additional Information

**Who can access the data:** Open to all requesters who provide a methodologically sound proposal whose use has also been approved by an independent review committee.

**Types of analyses:** There are no a priori limits. Limits are based on approved proposals.

**Mechanisms of data availability:** Secure Data transfer. Interested parties will be required to complete an institutional Data Use Agreement.
